# Supplementary material for: Lonomia obliqua Venom Induces NF-κB Activation and a Pro-Inflammatory Profile in THP-1-Derived Macrophage
Source: MDPI journal article supplement (doi:10.3390/toxins13070462), 2021-06-30
Supplement: s1 [file s1]

# Supplementary Materials: *Lonomia obliqua* Venom Induces NF- $\kappa$ B Activation and a Pro-Inflammatory Profile in THP-1-Derived Macrophage

Douglas Oliveira, Jean Gabriel de Souza, Miryam Paola Alvarez-Flores, Priscila Cunegundes, Carlos DeOcesano-Pereira, Aline Maia Lobba, Renata N. Gomes and Ana Marisa Chudzinski-Tavassi

## THP-1 monocyte cells differentiated in macrophages

After the differentiation protocol, macrophage obtention was confirmed by CD14 and CD11b expression modulation and cellular morphology. Figure S1 A and B show a significant increase in both CD14 and CD11b expression in macrophages accessed by imaging flow cytometry. CD14 presented a mean of  $1.2 \times 10^4$  in monocytes and  $3.3 \times 10^4$  in macrophages, while CD11b was  $3.4 \times 10^4$  in monocytes and  $9.8 \times 10^4$  in after differentiation. Data are shown as the median of fluorescence intensity ( $p < 0.05$ ). We also evaluate macrophage adherence and morphology. Macrophages were differentiated in microscope cover glass, and then these cells and monocytes were fixed and stained with phalloidin-AF488 (1:1000) and Hoechst (5  $\mu$ M). Image capture was performed using a Zeiss LSM 510 confocal microscope and processed by AxioVision 4.7.2 software. Cells after differentiation presented total adherence and an increase in size and cytoplasmic volume when compared to THP-1 monocytes.

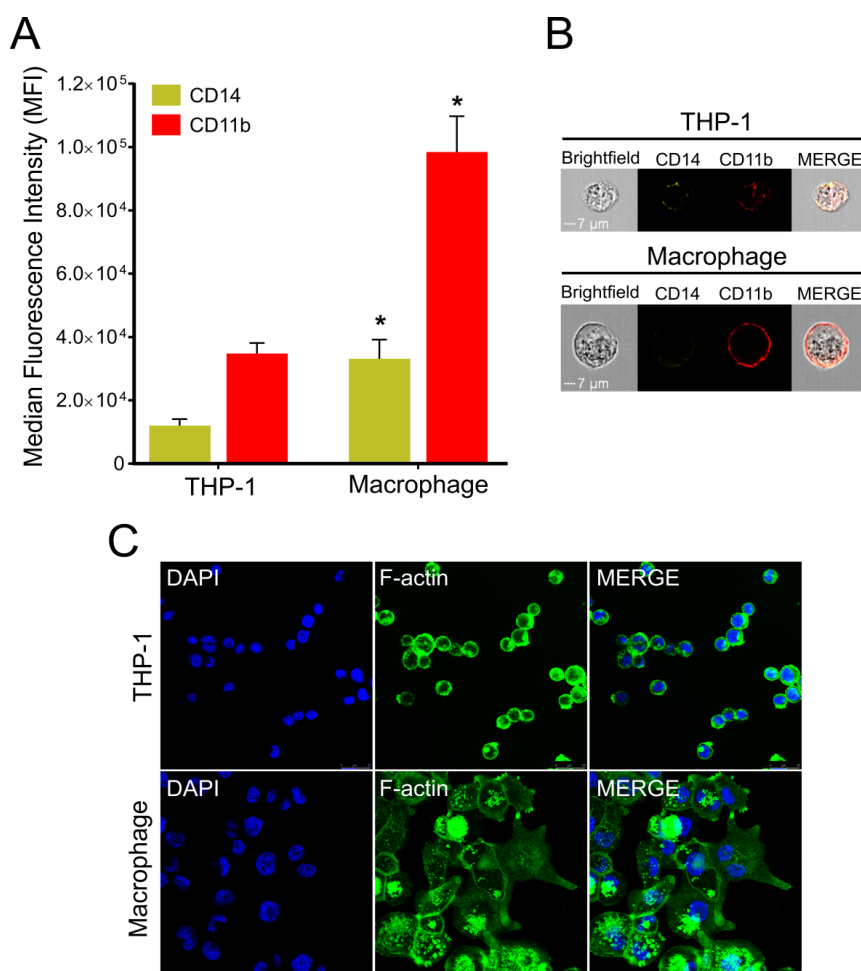

**Figure S1.** THP-1 monocyte differentiation in macrophages. The differentiation protocol was evaluated by image flow cytometry with anti-CD14-APC and anti-CD11b-PECy7 antibodies, and cellular morphology was assessed by confocal microscopy. (A) Upregulation of membrane markers after PMA treatment measured by fluorescence intensity (\*  $p < 0.05$ ). (B) Representative cytometry images of CD14 (red) and CD11b (yellow) staining. (C) Monocytes' and macrophages' morphological differences with phalloidin (green) and nuclei (blue).
